# Supplementary material
Source: MDPI journal article supplement (https://www.mdpi.com/2297-8739/9/8/200)
Supplement: s1 [file s1]

Table S1: Average percent recoveries ( $\pm$ standard deviation) of four antibiotics extracted from different soil matrices using different pre-processing techniques, extraction solutions, and extraction methods.

| Matrix <sup>†‡</sup> | Pre-Processing Steps |                         | Extraction Procedure |                                          | Antibiotic Recoveries (%) |              |             |             |
|----------------------|----------------------|-------------------------|----------------------|------------------------------------------|---------------------------|--------------|-------------|-------------|
|                      | Ground               | Freeze Dry <sup>§</sup> | ASE vs. Batch        | Extraction Solution                      | SMX                       | TMP          | LIN         | OFL         |
| Bulk Soil            | NO                   | NO                      | ASE                  | ACN/H <sub>2</sub> O (50/50)             | 92 $\pm$ 6                | 35 $\pm$ 7   | 31 $\pm$ 5  | 0           |
|                      |                      |                         | Batch                |                                          | 73 $\pm$ 11               | 15 $\pm$ 4   | 0           | 0           |
|                      |                      |                         | ASE                  | MeOH                                     | 81 $\pm$ 8                | 40 $\pm$ 2   | 32 $\pm$ 1  | 0           |
|                      |                      |                         | Batch                |                                          | 34 $\pm$ 6                | 25 $\pm$ 2   | 0           | 0           |
|                      |                      |                         | ASE                  | FA (0.1%)                                | 0                         | 28 $\pm$ 2   | 43 $\pm$ 4  | 0           |
|                      |                      |                         | Batch                |                                          | 0                         | 2 $\pm$ 0.2  | 32 $\pm$ 3  | 0           |
|                      |                      |                         | ASE                  | MeOH/H <sub>2</sub> O (20/80)            | 79 $\pm$ 13               | 34 $\pm$ 6   | 31 $\pm$ 6  | 0           |
|                      |                      |                         | Batch                |                                          | 42 $\pm$ 2                | 10 $\pm$ 0.4 | 0           | 0           |
| Soil A               | YES                  | YES                     | ASE                  | ACN/H <sub>2</sub> O (v/v, 50/50) pH 2.8 | 40 $\pm$ 8                | 89 $\pm$ 16  | 39 $\pm$ 7  | 2 $\pm$ 1   |
|                      |                      | NO                      |                      |                                          | 24 $\pm$ 3                | 41 $\pm$ 10  | 84 $\pm$ 15 | 2 $\pm$ 2   |
| Soil B               | YES                  | YES                     |                      |                                          | 6 $\pm$ 2                 | 55 $\pm$ 8   | 24 $\pm$ 6  | 1 $\pm$ 0.4 |
|                      |                      | NO                      |                      |                                          | 0                         | 37 $\pm$ 11  | 55 $\pm$ 17 | 0           |
| Soil C               | YES                  | YES                     |                      |                                          | 22 $\pm$ 4                | 65 $\pm$ 14  | 41 $\pm$ 7  | 2 $\pm$ 1   |
|                      |                      | NO                      |                      |                                          | 11 $\pm$ 7                | 58 $\pm$ 6   | 83 $\pm$ 4  | 18 $\pm$ 9  |
| Soil D               | YES                  | YES                     |                      |                                          | 13 $\pm$ 2                | 66 $\pm$ 9   | 13 $\pm$ 2  | 2 $\pm$ 1   |
|                      |                      | NO                      |                      |                                          | 11 $\pm$ 2                | 46 $\pm$ 6   | 35 $\pm$ 4  | 10 $\pm$ 5  |

<sup>†</sup> Bulk Soil – agricultural silt loam (Ap Horizon); Soil A – agricultural silt loam (Ap Horizon); Soil B – agricultural loam (B Horizon); Soil C – forested loam (A Horizon); Soil D – forested loam (B Horizon)

<sup>‡</sup> Soils A, B, C, and D were air dried and ground before being equilibrated with spiked antibiotic solution

<sup>§</sup> Freeze-drying occurred after equilibration with spiked antibiotic solution to allow long-term storage prior to ASE analysis.
